# Supplementary material
Source: PubMed Central journal article supplement (PMC7572516)
Supplement: NIHMS1597463-supplement-Combined_Trials_Table_S1.pdf [file NIHMS1597463-supplement-Combined_Trials_Table_S1.pdf]

**Table S1.** Phases of clinical trials for the combined pediatric and adult trials reviewed under BPCA and/or PREA and the Orphan Drug Act.

| Type of Drug Reviews | Type of Products | Phases of Clinical Trials  |                            |                            |                  |               |
|----------------------|------------------|----------------------------|----------------------------|----------------------------|------------------|---------------|
|                      |                  | 1                          | 2                          | 3                          | 4                | Unknown       |
| BPCA and/or PREA     | Drug             | 2.2% (1/46) <sup>a</sup>   | 8.7% (4/46) <sup>a</sup>   | 71.7% (33/46)              | n/a <sup>b</sup> | 19.6% (9/46)  |
|                      | Biologic         | n/a <sup>b</sup>           | 12.5% (1/8)                | 75% (6/8)                  | n/a <sup>b</sup> | 12.5% (1/8)   |
| Orphan               | Drug             | 8.5% (4/47) <sup>a</sup>   | 23.4% (11/47) <sup>a</sup> | 48.9% (23/47) <sup>a</sup> | 2.1% (1/47)      | 27.7% (13/47) |
|                      | Biologic         | 18.2% (10/55) <sup>a</sup> | 32.7% (18/55) <sup>a</sup> | 41.8% (23/55) <sup>a</sup> | n/a <sup>b</sup> | 20% (11/55)   |

<sup>a</sup>Some overlap between phases of clinical trials

<sup>b</sup>n/a – not applicable
