# Supplementary material
Source: PubMed Central journal article supplement (PMC7572516)

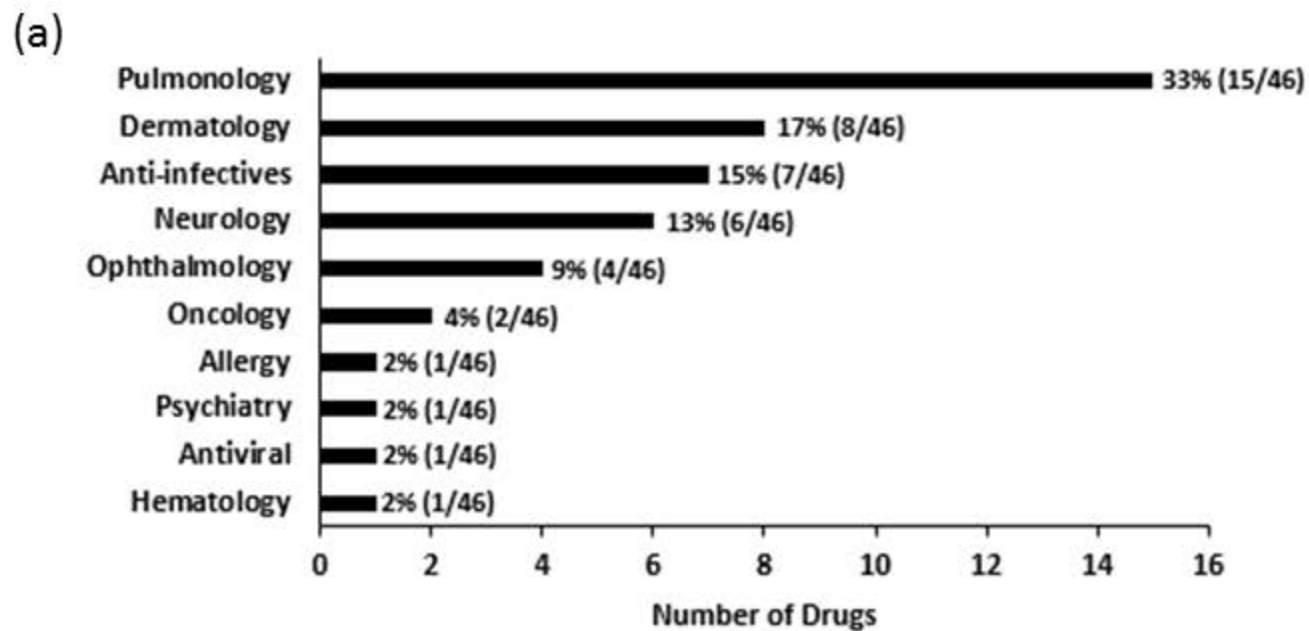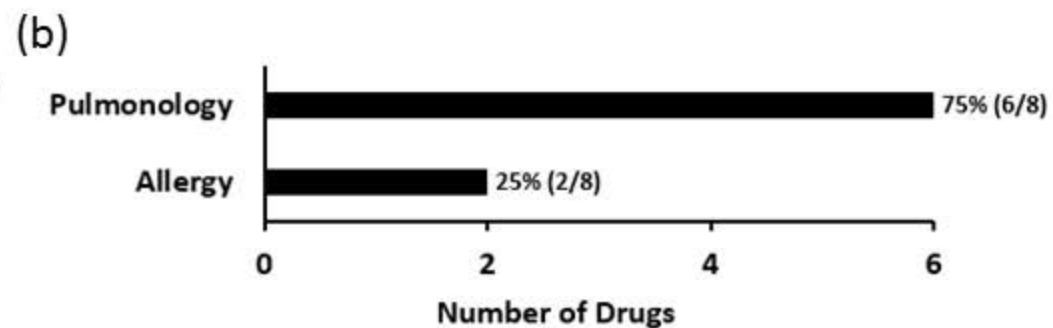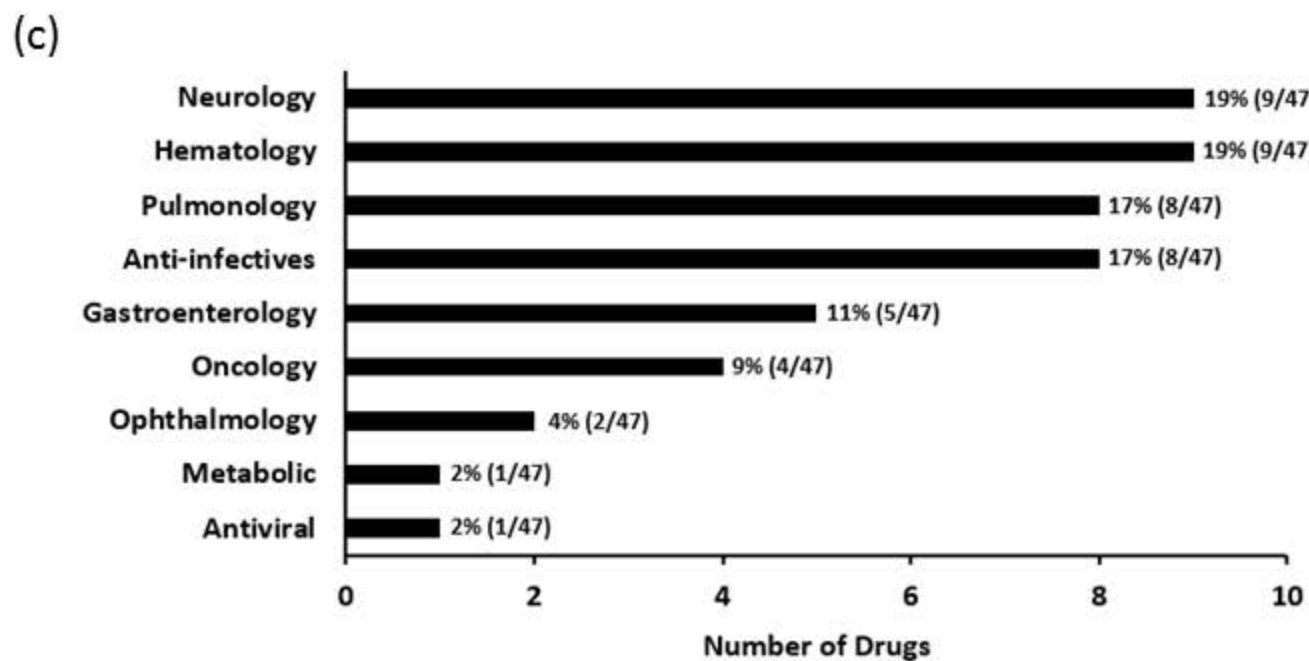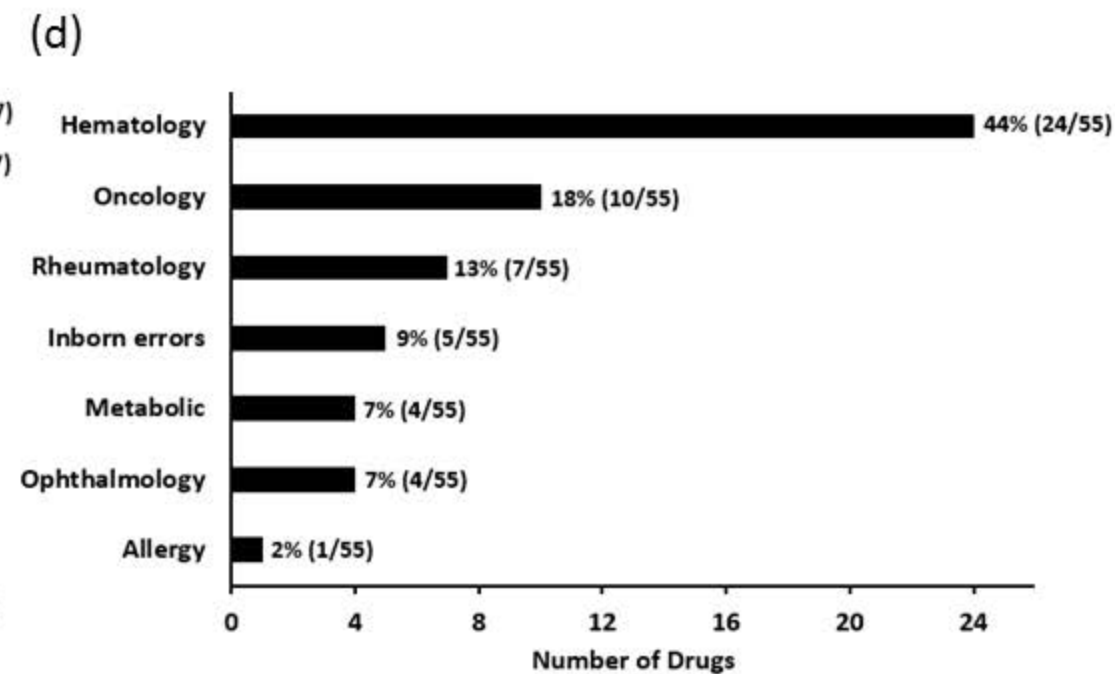

Supplement: NIHMS1597463-supplement-Combined_Trials_Figure_S1.pdf [file NIHMS1597463-supplement-Combined_Trials_Figure_S1.pdf]
